# Supplementary material
Source: PubMed Central journal article supplement (PMC2665112)

## SUPPLEMENTARY FIGURE LEGENDS

Supplementary Figure S1: TcpB inhibits TLR 2 induced NF- $\kappa$ B activation and TNF secretion. (a) Suppression of TLR 2 induced NF- $\kappa$ B activation by TcpB. HEK-TLR 2 cells were co-transfected with empty vector (100 ng) or TcpB (100 ng) with pNF- $\kappa$ B-Luc (50 ng) reporter plasmid and pRL-TK (10 ng). Transfected cells were induced with TLR 2 ligand FSL-1 and luciferase activity was measured 24 hours post transfection using dual luciferase reporter assay system (Promega). (b) TcpB suppresses TNF secretion by macrophages. J774 cells were transduced with lentivirus harboring YFP or TcpB and secreted TNF levels in the culture supernatants were quantified using a mouse TNF ELISA kit (BD Biosciences).

Supplementary Figure S2: Sub cellular localization of TcpB in HeLa cells. HeLa cells were transfected with pCMV-HA-TcpB (A1 to B4) or pCMV-myc-TcpB (C1 to C4) plasmid and stained for TcpB (A1, B1 & C1), actin (A2), tubulin (B2 & C2) and merged (A3, B3 & C3). A4, B4 & C4 are sections of A3, B3 & C3, respectively. Images D1 to D4 are transfected cells treated with nocodazole and stained for TcpB (D1), tubulin (D2), merged (D3) and a section of the projected image (D4). Cells were transfected with HA-TcpB<sup>ATTIR</sup> (E1 to E4) or HA-TcpB<sup>TIR</sup> and (F1 to F4) and stained for TcpB (E1 & F1), tubulin (E2 & F2) and merged (E3 & F3). E4 and F4 are sections of E3 and F3, respectively. Images G1 to G4 are HeLa cells expressing HA-TcpB<sup>G158A</sup> stained for TcpB (G1), tubulin (G2), merged (G3) and section of the projected image (G4). Scale bar 5 microns.

Supplementary Figure S3: TcpB induced cell shrinkage and rounding up of cells. HeLa cells were stained for actin (A) or tubulin (B). Left side images are intact cells and right side images are cells expressing TcpB.

Supplementary Figure S4: Homology model of TIR domain of TcpB based on crystal structure of human TLR-1 using Geno3D program. Glycine 158 is shown in yellow.

Supplementary Figure S1

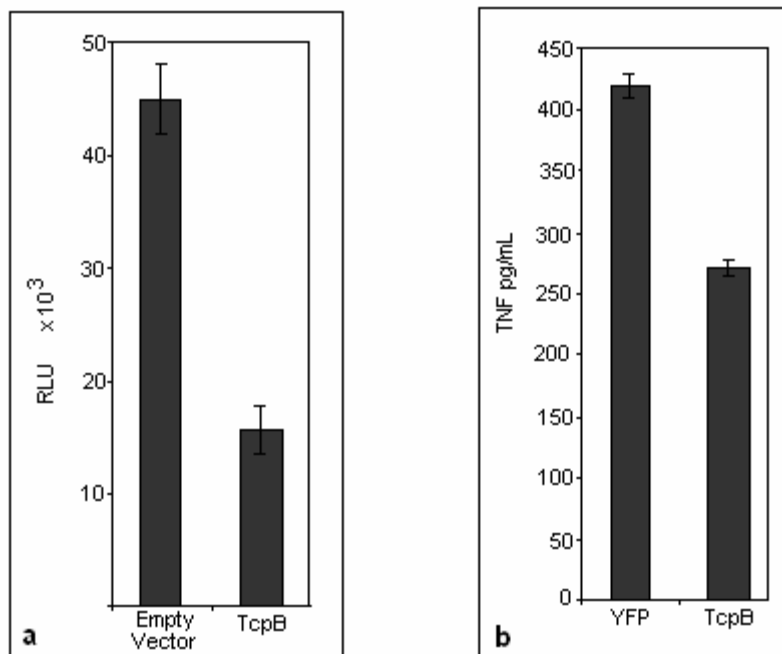

Supplementary Figure S2

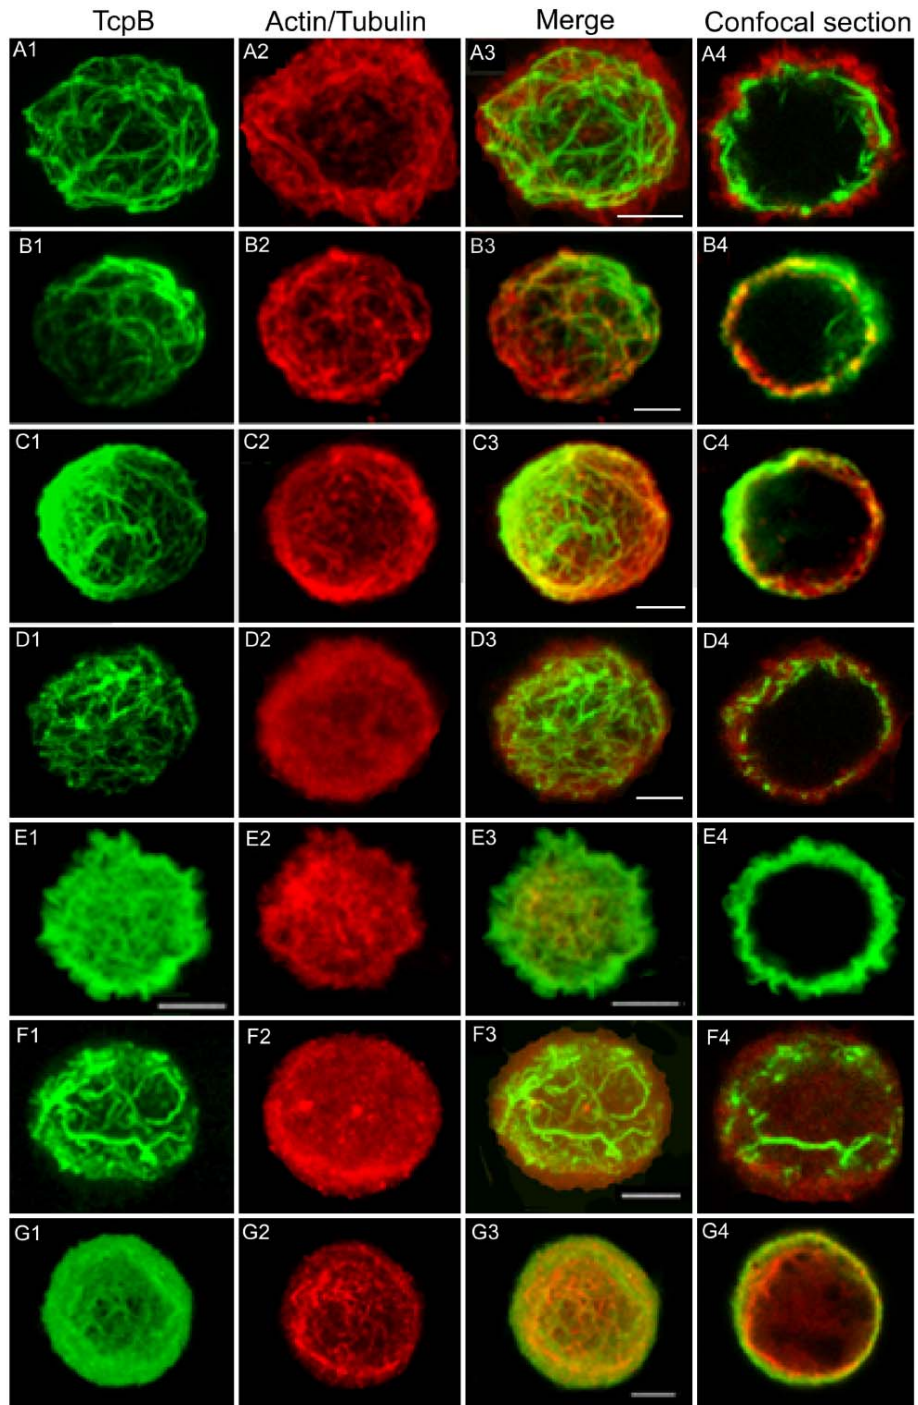

Supplementary Figure S3

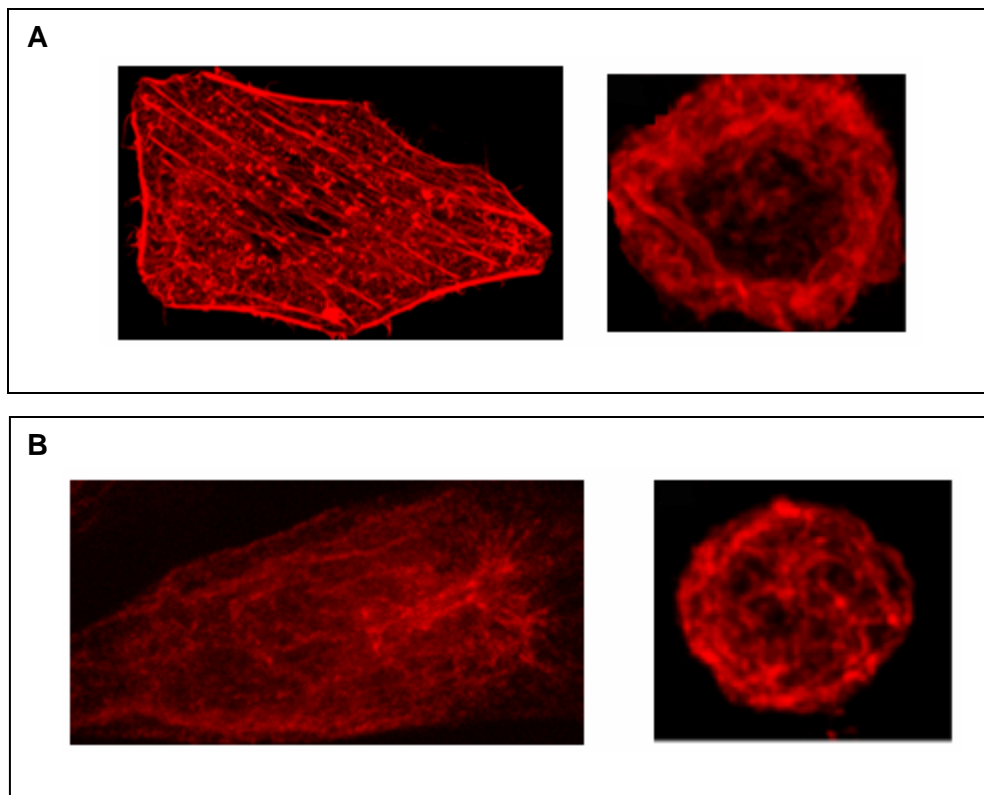

Supplementary Figure S4

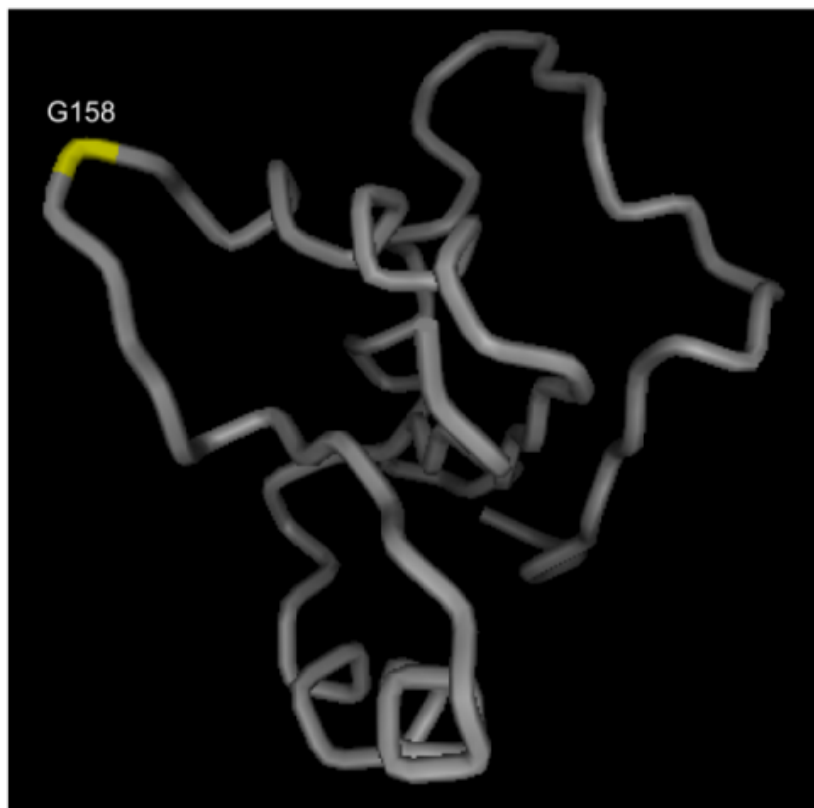

Supplement: M805458200_1.pdf [file M805458200_1.pdf]
